# Supplementary material
Source: publisher figshare collection journal article supplement (https://acs.figshare.com/ndownloader/files/4769626)
Supplement: Supplementary file 1 [file 4769626]

 
data_jfe10a 
 
_audit_creation_method            SHELXL-97 
_chemical_name_systematic 
; 
 ? 
; 
_chemical_name_common             ? 
_chemical_melting_point           ? 
_chemical_formula_moiety          ? 
_chemical_formula_sum 
 'C20 H52 Li2 N2 O2 Sn4' 
_chemical_formula_weight          841.28 
 
loop_ 
 _atom_type_symbol 
 _atom_type_description 
 _atom_type_scat_dispersion_real 
 _atom_type_scat_dispersion_imag 
 _atom_type_scat_source 
 'C'  'C'   0.0033   0.0016 
 'International Tables Vol C Tables 4.2.6.8 and 6.1.1.4' 
 'H'  'H'   0.0000   0.0000 
 'International Tables Vol C Tables 4.2.6.8 and 6.1.1.4' 
 'Li'  'Li'  -0.0003   0.0001 
 'International Tables Vol C Tables 4.2.6.8 and 6.1.1.4' 
 'N'  'N'   0.0061   0.0033 
 'International Tables Vol C Tables 4.2.6.8 and 6.1.1.4' 
 'Sn'  'Sn'  -0.6537   1.4246 
 'International Tables Vol C Tables 4.2.6.8 and 6.1.1.4' 
 'O'  'O'   0.0106   0.0060 
 'International Tables Vol C Tables 4.2.6.8 and 6.1.1.4' 
 
_symmetry_cell_setting            ? 
_symmetry_space_group_name_H-M    ? 
 
loop_ 
 _symmetry_equiv_pos_as_xyz 
 'x, y, z' 
 '-x, -y, z' 
 'y, -x, -z' 
 '-y, x, -z' 
 'x+1/2, -y+1/2, z+1/2' 
 '-x+1/2, y+1/2, z+1/2' 
 'y+1/2, x+1/2, -z+1/2' 
 '-y+1/2, -x+1/2, -z+1/2' 
 
_cell_length_a                    9.936(3) 
_cell_length_b                    9.936(3) 
_cell_length_c                    17.727(5) 
_cell_angle_alpha                 90.00 
_cell_angle_beta                  90.00 
_cell_angle_gamma                 90.00 
_cell_volume                      1750.0(8) 
_cell_formula_units_Z             2 
_cell_measurement_temperature     193(2) 
_cell_measurement_reflns_used     ? 
_cell_measurement_theta_min       ? 
_cell_measurement_theta_max       ? 
 
_exptl_crystal_description        ? 
_exptl_crystal_colour             ? 
_exptl_crystal_size_max           0.46 
_exptl_crystal_size_mid           0.27 
_exptl_crystal_size_min           0.24 
_exptl_crystal_density_meas       ? 
_exptl_crystal_density_diffrn     1.597 
_exptl_crystal_density_method     'not measured' 
_exptl_crystal_F_000              816 
_exptl_absorpt_coefficient_mu     2.836 
_exptl_absorpt_correction_type    ? 
_exptl_absorpt_correction_T_min   0.3560 
_exptl_absorpt_correction_T_max   0.5518 
_exptl_absorpt_process_details    ? 
 
_exptl_special_details 
; 
 ? 
; 
 
_diffrn_ambient_temperature       193(2) 
_diffrn_radiation_wavelength      0.71073 
_diffrn_radiation_type            MoK\a 
_diffrn_radiation_source          'fine-focus sealed tube' 
_diffrn_radiation_monochromator   graphite 
_diffrn_measurement_device_type   ? 
_diffrn_measurement_method        ? 
_diffrn_detector_area_resol_mean  ? 
_diffrn_standards_number          ? 
_diffrn_standards_interval_count  ? 
_diffrn_standards_interval_time   ? 
_diffrn_standards_decay_%         ? 
_diffrn_reflns_number             4898 
_diffrn_reflns_av_R_equivalents   0.0325 
_diffrn_reflns_av_sigmaI/netI     0.0539 
_diffrn_reflns_limit_h_min        -3 
_diffrn_reflns_limit_h_max        13 
_diffrn_reflns_limit_k_min        -9 
_diffrn_reflns_limit_k_max        10 
_diffrn_reflns_limit_l_min        -23 
_diffrn_reflns_limit_l_max        23 
_diffrn_reflns_theta_min          2.35 
_diffrn_reflns_theta_max          28.74 
_reflns_number_total              2113 
_reflns_number_gt                 1376 
_reflns_threshold_expression      >2sigma(I) 
 
_computing_data_collection        ? 
_computing_cell_refinement        ? 
_computing_data_reduction         ? 
_computing_structure_solution     'SHELXS-97 (Sheldrick, 1990)' 
_computing_structure_refinement   'SHELXL-97 (Sheldrick, 1997)' 
_computing_molecular_graphics     ? 
_computing_publication_material   ? 
 
_refine_special_details 
; 
 Refinement of F^2^ against ALL reflections.  The weighted R-factor wR and 
 goodness of fit S are based on F^2^, conventional R-factors R are based 
 on F, with F set to zero for negative F^2^. The threshold expression of 
 F^2^ > 2sigma(F^2^) is used only for calculating R-factors(gt) etc. and is 
 not relevant to the choice of reflections for refinement.  R-factors based 
 on F^2^ are statistically about twice as large as those based on F, and R- 
 factors based on ALL data will be even larger. 
; 
 
_refine_ls_structure_factor_coef  Fsqd  
_refine_ls_matrix_type            full 
_refine_ls_weighting_scheme       calc  
_refine_ls_weighting_details 
 'calc w=1/[\s^2^(Fo^2^)+(0.0790P)^2^+0.0000P] where P=(Fo^2^+2Fc^2^)/3' 
_atom_sites_solution_primary      direct 
_atom_sites_solution_secondary    difmap 
_atom_sites_solution_hydrogens    geom 
_refine_ls_hydrogen_treatment     mixed 
_refine_ls_extinction_method      none 
_refine_ls_extinction_coef        ? 
_refine_ls_abs_structure_details 
 'Flack H D (1983), Acta Cryst. A39, 876-881' 
_refine_ls_abs_structure_Flack    0.41(13) 
_refine_ls_number_reflns          2113 
_refine_ls_number_parameters      77 
_refine_ls_number_restraints      0 
_refine_ls_R_factor_all           0.0792 
_refine_ls_R_factor_gt            0.0487 
_refine_ls_wR_factor_ref          0.1358 
_refine_ls_wR_factor_gt           0.1290 
_refine_ls_goodness_of_fit_ref    0.981 
_refine_ls_restrained_S_all       0.981 
_refine_ls_shift/su_max           0.001 
_refine_ls_shift/su_mean          0.000 
 
loop_ 
 _atom_site_label 
 _atom_site_type_symbol 
 _atom_site_fract_x 
 _atom_site_fract_y 
 _atom_site_fract_z 
 _atom_site_U_iso_or_equiv 
 _atom_site_adp_type 
 _atom_site_occupancy 
 _atom_site_symmetry_multiplicity 
 _atom_site_calc_flag 
 _atom_site_refinement_flags 
 _atom_site_disorder_assembly 
 _atom_site_disorder_group 
Sn1 Sn 0.35706(8) -0.09700(7) -0.10252(4) 0.0579(3) Uani 1 1 d . . . 
N1 N 0.5000 0.0000 -0.1629(5) 0.052(3) Uani 1 2 d S . . 
C1 C 0.3041(16) 0.0086(19) -0.0002(6) 0.149(7) Uani 1 1 d . . . 
H1A H 0.3515 -0.0296 0.0411 0.223 Uiso 1 1 calc R . . 
H1B H 0.2100 0.0009 0.0082 0.223 Uiso 1 1 calc R . . 
H1C H 0.3276 0.1009 -0.0051 0.223 Uiso 1 1 calc R . . 
C2 C 0.4163(12) -0.244(4) -0.0897(9) 0.229(15) Uani 1 1 d . . . 
H2A H 0.4242 -0.2887 -0.1369 0.343 Uiso 1 1 calc R . . 
H2B H 0.3575 -0.2937 -0.0579 0.343 Uiso 1 1 calc R . . 
H2C H 0.5024 -0.2378 -0.0668 0.343 Uiso 1 1 calc R . . 
C3 C 0.1800(13) -0.107(2) -0.1700(10) 0.157(9) Uani 1 1 d . . . 
H3A H 0.1975 -0.0680 -0.2180 0.236 Uiso 1 1 calc R . . 
H3B H 0.1096 -0.0586 -0.1459 0.236 Uiso 1 1 calc R . . 
H3C H 0.1540 -0.1981 -0.1762 0.236 Uiso 1 1 calc R . . 
C4 C 0.795(2) -0.262(2) -0.3110(9) 0.182(11) Uani 1 1 d . . . 
H4A H 0.7392 -0.3044 -0.3474 0.218 Uiso 1 1 calc R . . 
H4B H 0.8385 -0.1875 -0.3343 0.218 Uiso 1 1 calc R . . 
C5 C 0.887(2) -0.349(2) -0.2850(11) 0.147(7) Uani 1 1 d . . . 
H5A H 0.9734 -0.3079 -0.2833 0.176 Uiso 1 1 calc R . . 
H5B H 0.8922 -0.4255 -0.3172 0.176 Uiso 1 1 calc R . . 
O1 O 0.7179(7) -0.2179(7) -0.2500 0.100(4) Uani 1 2 d S . . 
Li1 Li 0.5830(14) -0.0830(14) -0.2500 0.051(5) Uani 1 2 d S . . 
 
loop_ 
 _atom_site_aniso_label 
 _atom_site_aniso_U_11 
 _atom_site_aniso_U_22 
 _atom_site_aniso_U_33 
 _atom_site_aniso_U_23 
 _atom_site_aniso_U_13 
 _atom_site_aniso_U_12 
Sn1 0.0674(5) 0.0635(5) 0.0428(3) 0.0092(3) 0.0072(3) -0.0004(3) 
N1 0.061(7) 0.066(7) 0.028(4) 0.000 0.000 0.027(5) 
C1 0.213(19) 0.135(14) 0.098(9) -0.027(10) 0.110(11) -0.045(16) 
C2 0.031(6) 0.55(4) 0.103(11) -0.128(19) -0.021(7) 0.045(15) 
C3 0.047(7) 0.26(2) 0.166(15) 0.132(15) 0.009(8) -0.022(10) 
C4 0.20(2) 0.21(2) 0.128(13) -0.035(14) 0.046(14) 0.173(18) 
C5 0.124(16) 0.150(19) 0.17(2) 0.004(14) 0.039(14) 0.031(12) 
O1 0.099(6) 0.099(6) 0.103(9) -0.006(6) -0.006(6) 0.058(8) 
Li1 0.055(8) 0.055(8) 0.043(9) -0.014(7) -0.014(7) 0.018(10) 
 
_geom_special_details 
; 
 All esds (except the esd in the dihedral angle between two l.s. planes) 
 are estimated using the full covariance matrix.  The cell esds are taken 
 into account individually in the estimation of esds in distances, angles 
 and torsion angles; correlations between esds in cell parameters are only 
 used when they are defined by crystal symmetry.  An approximate (isotropic) 
 treatment of cell esds is used for estimating esds involving l.s. planes. 
; 
 
loop_ 
 _geom_bond_atom_site_label_1 
 _geom_bond_atom_site_label_2 
 _geom_bond_distance 
 _geom_bond_site_symmetry_2 
 _geom_bond_publ_flag 
Sn1 C2 1.59(3) . ? 
Sn1 N1 2.022(4) . ? 
Sn1 C3 2.129(16) . ? 
Sn1 C1 2.160(12) . ? 
Sn1 Li1 3.223(5) 2_655 ? 
N1 Li1 1.935(14) 2_655 ? 
N1 Li1 1.935(14) . ? 
N1 Sn1 2.022(4) 2_655 ? 
C4 C5 1.34(2) . ? 
C4 O1 1.396(13) . ? 
C5 C5 1.35(3) 8_554 ? 
O1 C4 1.396(13) 8_554 ? 
O1 Li1 1.90(2) . ? 
Li1 N1 1.935(14) 7_544 ? 
Li1 Li1 2.33(4) 2_655 ? 
Li1 Sn1 3.223(5) 2_655 ? 
Li1 Sn1 3.223(5) 7_544 ? 
 
loop_ 
 _geom_angle_atom_site_label_1 
 _geom_angle_atom_site_label_2 
 _geom_angle_atom_site_label_3 
 _geom_angle 
 _geom_angle_site_symmetry_1 
 _geom_angle_site_symmetry_3 
 _geom_angle_publ_flag 
C2 Sn1 N1 104.7(7) . . ? 
C2 Sn1 C3 110.1(8) . . ? 
N1 Sn1 C3 107.7(4) . . ? 
C2 Sn1 C1 114.6(7) . . ? 
N1 Sn1 C1 112.6(5) . . ? 
C3 Sn1 C1 107.0(7) . . ? 
C2 Sn1 Li1 123.8(7) . 2_655 ? 
N1 Sn1 Li1 34.6(3) . 2_655 ? 
C3 Sn1 Li1 73.9(4) . 2_655 ? 
C1 Sn1 Li1 117.2(5) . 2_655 ? 
Li1 N1 Li1 74.1(10) 2_655 . ? 
Li1 N1 Sn1 121.22(15) 2_655 2_655 ? 
Li1 N1 Sn1 109.0(2) . 2_655 ? 
Li1 N1 Sn1 109.0(2) 2_655 . ? 
Li1 N1 Sn1 121.22(15) . . ? 
Sn1 N1 Sn1 116.1(4) 2_655 . ? 
C5 C4 O1 108.1(15) . . ? 
C4 C5 C5 107.8(12) . 8_554 ? 
C4 O1 C4 104.9(15) . 8_554 ? 
C4 O1 Li1 127.5(7) . . ? 
C4 O1 Li1 127.5(7) 8_554 . ? 
O1 Li1 N1 127.0(5) . 7_544 ? 
O1 Li1 N1 127.0(5) . . ? 
N1 Li1 N1 105.9(10) 7_544 . ? 
O1 Li1 Li1 180.0 . 2_655 ? 
N1 Li1 Li1 53.0(5) 7_544 2_655 ? 
N1 Li1 Li1 53.0(5) . 2_655 ? 
O1 Li1 Sn1 105.2(3) . 2_655 ? 
N1 Li1 Sn1 119.3(7) 7_544 2_655 ? 
N1 Li1 Sn1 36.38(7) . 2_655 ? 
Li1 Li1 Sn1 74.8(3) 2_655 2_655 ? 
O1 Li1 Sn1 105.2(3) . 7_544 ? 
N1 Li1 Sn1 36.38(7) 7_544 7_544 ? 
N1 Li1 Sn1 119.3(7) . 7_544 ? 
Li1 Li1 Sn1 74.8(3) 2_655 7_544 ? 
Sn1 Li1 Sn1 149.7(7) 2_655 7_544 ? 
 
_diffrn_measured_fraction_theta_max    0.949 
_diffrn_reflns_theta_full              28.74 
_diffrn_measured_fraction_theta_full   0.949 
_refine_diff_density_max    1.636 
_refine_diff_density_min   -0.968 
_refine_diff_density_rms    0.141 
